RESEARCH ARTICLE

# Foot-and-Mouth Disease Virus-Associated Abortion and Vertical Transmission following Acute Infection in Cattle under Natural Conditions

Rajeev Ranjan<sup>1\*</sup>, Jitendra K. Biswal<sup>1</sup>, Saravanan Subramaniam<sup>1</sup>, Karam Pal Singh<sup>2</sup>, Carolina Stenfeldt<sup>3,4</sup>, Luis L. Rodriguez<sup>3</sup>, Bramhadev Pattnaik<sup>1</sup>, Jonathan Arzt<sup>3\*</sup>

**1** ICAR- Directorate of Foot and Mouth Disease, Mukteshwar, Nainital, Uttarakhand, India, **2** CADRAD, IVRI Izatnagar, Bareilly, Uttar Pradesh, India, **3** Foreign Animal Disease Research Unit, USDA-ARS, Plum Island Animal Disease Center, Greenport, New York, United States of America, **4** Oak Ridge Institute for Science and Education, PIADC Research Participation Program, Oak Ridge, Tennessee, United States of America

\* [jonathan.arzt@ars.usda.gov](mailto:jonathan.arzt@ars.usda.gov) (JA); [drrajraj@gmail.com](mailto:drrajraj@gmail.com) (RR)

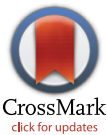

OPEN ACCESS

**Citation:** Ranjan R, Biswal JK, Subramaniam S, Singh KP, Stenfeldt C, Rodriguez LL, et al. (2016) Foot-and-Mouth Disease Virus-Associated Abortion and Vertical Transmission following Acute Infection in Cattle under Natural Conditions. PLoS ONE 11(12): e0167163. doi:10.1371/journal.pone.0167163

**Editor:** Zheng Xing, University of Minnesota College of Veterinary Medicine, UNITED STATES

**Received:** July 12, 2016

**Accepted:** November 9, 2016

**Published:** December 15, 2016

**Copyright:** This is an open access article, free of all copyright, and may be freely reproduced, distributed, transmitted, modified, built upon, or otherwise used by anyone for any lawful purpose. The work is made available under the [Creative Commons CC0](https://creativecommons.org/licenses/by/4.0/) public domain dedication.

**Data Availability Statement:** Data are available from GenBank (Genbank accession numbers KX228159, KX228160 and KX228161).

**Funding:** This work was funded by the Indian Council of Agricultural Research, New Delhi. Additional funding was provided by Agricultural Research Service-Current Research information System Project 1940-32000-057-00D and the United States Department of State, Biosecurity Engagement Program through the United States Department of Agriculture, Agricultural Research

## Abstract

Foot-and-mouth disease (FMD) is a highly contagious and economically important viral disease of cloven-hoofed animals, including domestic and wild host species. During recent FMD outbreaks in India, spontaneous abortions were reported amongst FMD-affected and asymptomatic cows. The current study was an opportunistic investigation of these naturally occurring bovine abortions to assess causality of abortion and vertical transmission of FMDV from infected cows to fetuses. For this purpose, fetal tissue samples of eight abortuses (heart, liver, kidney, spleen, palatine tonsil, umbilical cord, soft palate, tongue, lungs, and submandibular lymph node) were collected and screened by various detection methods, including viral genome detection, virus isolation, and immunomicroscopy. Amongst these cases, gross pathological changes were observed in 3 abortuses. Gross pathological findings included blood-tinged peritoneal and pleural effusions and myocarditis. Hearts of infected calves had mild to moderate degeneration and necrosis of the myocardium with moderate infiltration by mixed inflammatory cells. Localization of FMDV antigen was demonstrated in lungs and soft palate by immunomicroscopy. FMDV serotype O viral genome was recovered from 7 of 8 cases. Infectious FMDV serotype O was rescued by chemical transfection of the total RNA extracted from three soft palate samples and was sequenced to confirm 100% identity of the VP1 (capsid) coding region with isolates collected from infected cattle during the acute phase of infection. Based upon these findings, it may be concluded that FMDV-associated abortion occurred among the infected pregnant cows included within this study and FMDV was subsequently transmitted vertically to fetuses. This is the first documentation of FMDV-associated abortions in cattle.

Service Office of International Research Programs. The funding sources had no role in study design, data collection and analysis or the decision to publish the work. CS is a recipient of a Plum Island Animal Disease Center Research Participation Program fellowship, administered by the Oak Ridge Institute for Science and Education (ORISE, [www.ornl.gov](http://www.ornl.gov)) through an interagency agreement with the US Department of Energy.

**Competing Interests:** The authors have declared that no competing interests exist.

## Introduction

Foot-and-mouth disease (FMD) is a highly contagious and economically important viral disease of domestic cloven-hoofed animals including cattle, goats, sheep, pigs and more than 70 wild species [1, 2]. It is a major barrier to worldwide trade in animals and animal products. The disease is caused by FMD virus (FMDV), genus *Aphthovirus*, family *Picornaviridae* [2, 3]. The clinical phase of FMD is characterised by pyrexia, lameness and vesicular lesions of the oral cavity, feet, snouts of pigs, and teats of dairy cows [4, 5]. FMDV exists in seven serologically and immunologically distinct serotypes (O, A, C, Asia 1, SAT-1, -2, -3) [6], which are further sub-divided into multiple topotypes/genotypes based on phylogenetic properties [7, 8]. Although FMD-associated mortality is low in adult animals, high mortality is sometimes observed among young animals and is often attributed to acute myocarditis [4, 9, 10].

FMD is highly transmissible during the clinical phase of infection [11, 12]. The common mechanism of spread of the disease is by direct contact, and may occur by mechanical transfer of virus from infected to susceptible animals through damaged skin or intact mucosae or by deposit of droplets or droplet nuclei (aerosols) in the respiratory tract of susceptible animals [13–15].

The O/ME-SA/Ind2001 lineage of FMDV has intermittently dominated circulating FMDVs in India since it was first reported in 2001 [16]. Between June 2013 and January 2014, the sub-lineage FMDV-O/ME-SA/Ind2001d caused extensive outbreaks of FMD in India, particularly in the southern region of the country [17]. During that period, this lineage was also detected in field outbreaks in the northern Indian state of Uttarakhand and in neighbouring countries including Bhutan in 2013 [18], Nepal and Sri Lanka in 2014 [19]. FMDV-Ind2001d has also spread to the Middle East including Saudi Arabia in 2013 [18] and Bahrain in 2015 [20]. The lineage was also reported from North African countries including Libya in 2013 [21], Algeria in 2014, and Tunisia in 2014 [19].

Vertical transmission is defined as an “infection that is transferred from dam to embryo, fetus, or new-born before, during, or shortly after parturition” [22]. Vertical transmission of various DNA and RNA viruses has been documented in animals [23, 24]. Similarly, transplacental transmission of viruses have been reported by several workers [25–27]. Specifically, transplacental transmission of blue tongue virus serotype-8 was demonstrated in goats with infectious virus recovered from the caprine fetuses. In cattle, transplacental transmission has previously been demonstrated for bovine immunodeficiency virus (BIV) by Meas *et al.* [28] and in bovine viral diarrhoea virus (BVDV) by Trautwein *et al.* [29].

There has been limited description and investigation of vertical transmission of FMDV. Early reports suggested vertical transmission by describing FMD-associated abortions in sheep [30, 31]. Similarly, large numbers of abortions were documented to occur within 24 h of the onset of lameness in sheep flocks during the 2001 outbreak in the UK [32]. Furthermore, it was subsequently demonstrated that the same FMDV strain that caused the UK 2001 outbreak, was able to cross the placenta and cause fetal death in ewes under experimental conditions [33, 34]. In an expert opinion survey conducted to assess the financial impact of FMD in Turkey, it was reported that the impact of FMD on abortion rate in exotic cattle (Holstein) and sheep were almost two times higher than in local breeds of cattle and sheep as well as in goats [35]. However, there is no confirmed report demonstrating fetal infection or abortion caused by FMDV under natural (field) conditions in any species. In the present study, we provide the first evidence of naturally occurring abortion and vertical transmission of FMDV in cattle under field outbreak conditions.

## Materials and Methods

### Permissions and ethics

The work described herein was performed by federal staff of the Directorate of Foot-and-Mouth Disease, Indian Council of Agricultural Research, Ministry of Agriculture, Government of India. The work occurred and the animals were maintained within facilities that were owned, maintained, or overseen by this division of the federal government; thus, no permits or approvals were required. Two study sites in India were in Mukteshwar, Uttarakhand State and Bhilai, Chhattisgarh State. All cases described herein occurred spontaneously in domestic cattle with no experimentation, inoculation, or treatment of live animals. No animals were euthanized for the purpose of this study. Sample collection was performed as part of routine field outbreak investigations; samples were subsequently compiled for the sake of the current investigation.

### History and animals

The cases described herein occurred associated with field outbreaks of FMD in dairy cattle herds in Mukteshwar, Uttarakhand State (Oct. 2013) and Bhilai, Chhattisgarh State (Dec 2013) in India. Cattle were mixed breed as are commonly maintained in India for dairy production containing variable proportion Holstein Friesian lineage and native *Bos indicus*. In both herds, all cows were vaccinated regularly (twice yearly in Mukteshwar; 4 times yearly in Bhilai) with a commercially available inactivated FMDV-trivalent vaccine containing serotypes A, O, and Asia1. The Mukteshwar farm was a small facility operated by the Indian Council of Agricultural Research. At the time of the outbreak, this farm housed 40 mature dairy cows amongst which 25 new cases of FMD occurred during the 10 day period of the outbreak (incidence = 25/40; 62.5%). The Bhilai farm was a large commercial dairy operation at which 222 cases of FMD were detected amongst 1836 adult dairy cows over the course of 35 days (incidence = 222/1836; 12.1%). Clinical signs exhibited by cattle consisted of variable combinations of vesicular and erosive stomatitis, interdigital vesicles and erosions, feed refusal, lameness, and ptyalism. All clinically observed FMD infections were confirmed diagnostically by viral genome detection (GD) methods including RT-LAMP and multiplex RT-PCR (mRT-PCR). During and after the clinical FMD outbreak period, abortions were reported from clinically affected and asymptomatic cows. Based upon logistical availability, eight abortuses from the affected farms were presented for examination and sampling. Necropsies and sample collections of all calves were conducted by a veterinary pathologist.

### Sample collection

In order to investigate vertical/transplacental transmission of FMDV from infected cows to their fetuses, 10 tissue samples were collected from the aborted fetuses at necropsy examination. Tissues collected were: heart, liver, kidney, spleen, palatine tonsil, umbilical cord, soft palate, tongue, lungs, and submandibular lymph node. Tissues were examined by conventional pathology, viral genome detection tests (GD) and virus isolation (VI). At necropsy examination, duplicate tissue samples were collected and stored in 50% (v/v) buffered glycerin for VI and in 10% neutral buffered formalin for histopathology. Tissue samples for VI and serotype-differentiating antigen ELISA were processed as 10% emulsion of homogenised suspension in PBS, the lysates were centrifuged at  $3000 \times g$  for 15 min and the supernatants were stored at  $-80^{\circ}\text{C}$  until analysis. These suspensions were used as antigen in serotype-determination ELISA carried out as previously described [36].

## RNA extraction and cDNA synthesis

The tissue samples in 50% glycerol phosphate buffer were used to prepare a 10% suspension in phosphate-buffered saline (pH: 7.4). Viral RNA was extracted from this suspension using QIAamp viral RNA mini kit (QIAGEN, Hilden, Germany) as per the manufacturer's instruction. The extracted RNA was further purified and treated with DNaseI using RNeasy kit (QIAGEN, Hilden, Germany) and was quantified by NanoDrop™ 1000 spectrophotometer considering the OD260/OD280 ratio, which was 1.8–2.0 for all the samples. Total RNA preparations were stored at  $-80^{\circ}\text{C}$  till further use. The cDNA synthesis was performed with ThermoScript™ Reverse Transcriptase (Invitrogen, USA) enzyme and FMDV specific reverse primer, NK61 [37] at  $55^{\circ}\text{C}$  for 2 h.

## Viral nucleic acid detection

Total RNA extracted was used for detection of FMDV RNA by the RT-LAMP assay [38]. For further confirmation of FMDV serotype, multiplex -PCR was carried out as described earlier [39] using the cDNA prepared as mentioned above. The m-PCR mix included, three serotype specific forward primers namely DHP13, DHP15 and DHP9 against O, A and Asia1, respectively and FMDV specific reverse primer NK61, Serotypes were differentiated based on amplicon size (249, 376, 537 bp specific for serotype O, A and Asia1 respectively). Both m-PCR and RT-LAMP amplified products were resolved on 2% agarose gel electrophoresis and visualized by ethidium bromide staining.

## Virus isolation, sequencing, and phylogenetics

Rescue of infectious FMDV was performed by chemical transfection of the extracted total RNA from each tissue collected on BHK-21 cells as previously described [40]. In brief,  $1\ \mu\text{g}$  of extracted RNA and  $2\ \mu\text{l}$  lipofectamine 2000 (Invitrogen, Carls-bad, USA) diluted in OPTI-MEM<sup>®</sup> I (Gibco, Life Technologies, NY, USA) were mixed and kept at room temperature for 20 min. These mixtures were transferred to monolayer BHK-21 cells in 24-well plates overlaid with  $200\ \mu\text{l}$  of GMEM (Thermo Fisher Scientific, Waltham, MA USA) and incubated for 4 h. After 4 h of incubation,  $700\ \mu\text{l}$  of GMEM was added and again incubated at  $37^{\circ}\text{C}$  for 48 h. Then the whole contents in the wells were harvested and stored at  $-80^{\circ}\text{C}$ .  $200\ \mu\text{l}$  of harvest aliquot was subjected to further passage in BHK-21 cells in order to amplify the virus rescued by transfection for further use.

For phylogenetic comparisons, PCR amplification of VP1 coding regions of FMDV were performed using the primer combination of ARS4 [41] and NK61 in combination with Fermentas Pfu DNA polymerase (Thermo Fisher Scientific, Waltham, MA USA) as previously described [16]. The PCR products were purified using QIA quick Gel Extraction Kit (QIAGEN, Hilden, Germany). Purified VP1 amplicons were sequenced on an ABI 3130 automated DNA sequencer (Applied Biosystems, CA, USA) with the Big Dye Terminator v3.1 (Thermo Fisher Scientific, Waltham, MA USA) cycle sequencing kit. Sequences were aligned using clustal W algorithm and genetic analysis was performed using MEGA 6.06 software [42].

## Histological examinations

Tissue samples fixed in 10% neutral buffer formalin were processed by routine methods prior to embedding in paraffin and microtomy at  $5\ \mu\text{m}$  sections. Routine histopathological examination (haematoxylin and eosin stain; H&E), as well as FMDV antigen detection by immunohistochemistry (IHC) and indirect fluorescence assay (IFA) were carried in different tissues as described by Arzt *et al.* [43]. Antigens were retrieved by microwave heating for 20 min in tris

EDTA (pH-9.2). FMDV-infected bovine tissues, previously confirmed with GD methods, were used as positive control and GD-negative tissues from an apparently healthy cow collected from slaughter house were used as negative control. Additional negative controls included duplicates of each experimental section incubated with the primary antibody substituted with a species- and isotype-matched antibody derived from normal sera for polyclonal antibodies. Primary and secondary antibodies were validated and optimized previously by serial dilution using known positive FMDV infected tongue vesicle sections. FMDV antigen was detected by use of FMDV serotype O rabbit polyclonal antibody (dilution 1: 2000 in blocking buffer) as primary antibody [44]. The secondary antibody detection system was goat anti rabbit IgG HRP and goat anti rabbit IgG Rodamine for IHC and IFA, respectively as per manufacture instruction (Santa Cruz Biotechnology).

## Results

### Clinical characteristics of the outbreak

All cases described herein occurred spontaneously in well-organized professional dairy farms in north and central India in 2013–2014. All cows had been previously vaccinated with a commercially available inactivated FMDV-trivalent vaccine containing serotypes A, O, and Asia1. Adult cows that had clinical signs of FMD had vesicular and erosive stomatitis, interdental vesicles and erosions, feed refusal with profuse salivation, lameness, and were subsequently diagnosed as FMDV-infected by GD (m-PCR and RT-LAMP) methods. During and after the onset of FMD in the herds, abortions and death of neonatal calves were reported amongst clinically affected and asymptomatic cows. In the current report, 8 cases of naturally occurring abortion were available to investigate causality of abortion and vertical transmission of FMDV from infected dams (Table 1).

### Macroscopic and microscopic lesions

Gross pathological changes were present in three out of 8 calves including myocarditis (2/8) and blood-tinged peritoneal and pleural effusions (3/8). (Table 1; Fig 1A). Mild to moderate multifocal pallor of the myocardium was detected in hearts of two affected calves and was interpreted as presumptive myocarditis (Fig 1B). Petechial haemorrhage and congestion of the splenic capsule were present in one aborted fetus. No significant gross changes were observed

**Table 1. Clinical status of FMDV infected cows and post-mortem findings in aborted fetuses and dead calves.**

| Dam ID | FMD status   | Gestational age when infected | Abortion/ Parturition day (dpm*) | Gross lesions in fetus             |
|--------|--------------|-------------------------------|----------------------------------|------------------------------------|
| 454    | Clinical FMD | 8 months 20 days              | 4                                | Bicavitary effusions, Myocarditis, |
| 571    | Clinical FMD | 8 months 25 days              | 10**                             | Bicavitary effusions, Myocarditis, |
| 483    | Asymptomatic | 4 months <sup>#</sup>         | 42 <sup>#</sup>                  | None                               |
| 271    | Asymptomatic | 6 months 15 days <sup>#</sup> | 45 <sup>#</sup>                  | None                               |
| 107    | Clinical FMD | 5 months 12 days              | 46                               | None                               |
| 450    | Clinical FMD | 1 month                       | 150                              | Bicavitary effusions               |
| 372    | Clinical FMD | 3 months 10 days              | 150                              | None                               |
| 562    | Clinical FMD | 3 months                      | 160                              | None                               |

\*dpm = days post onset of clinical manifestation of FMD

\*\*Calf died five days after birth

<sup>#</sup>day of infection based upon onset of FMD in the herd; dpm calculated as elapsed time between abortion and onset of FMD in the herd

doi:10.1371/journal.pone.0167163.t001

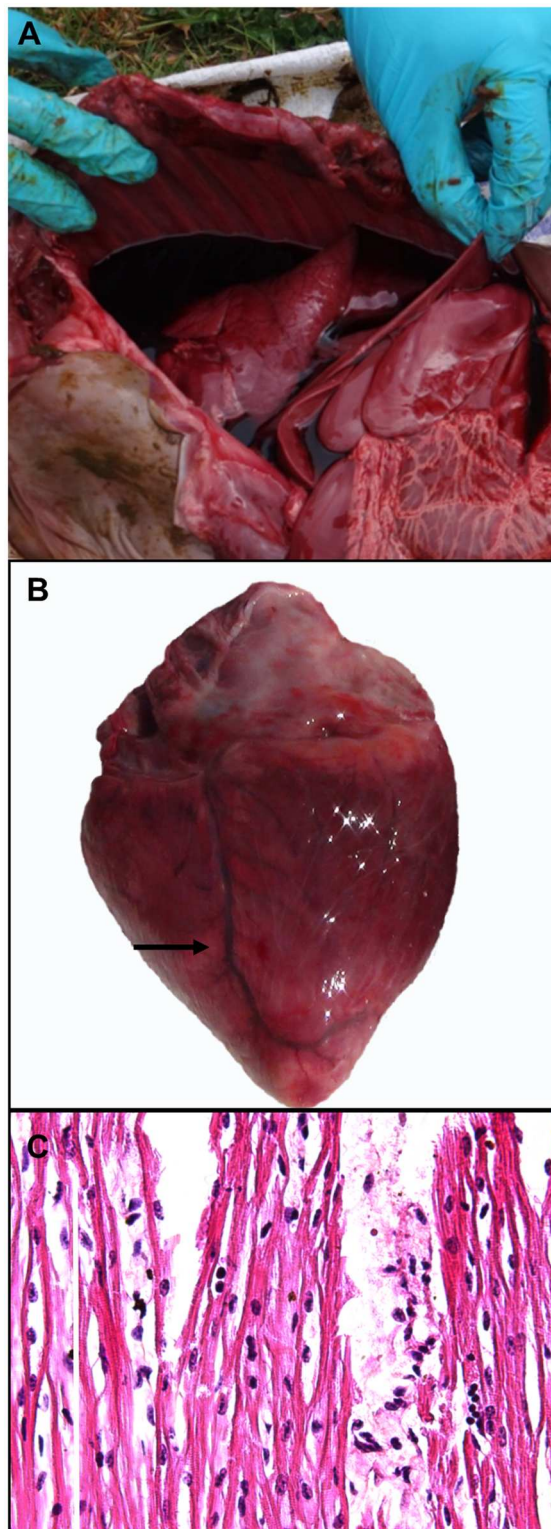

**Fig 1. Gross and histopathological findings of FMDV-associated myocarditis in still-borne calf. (A)** Sanguineous bicavitary effusions in still-borne calf from Dam ID#454. **(B)** Focal myocarditis seen as area of pallor (arrow) on epicardial surface of heart from aborted calf shown in panel (A). **(C)** Mixed mononuclear infiltrate and interstitial edema separating myocardial fibers in histological specimen from heart. Hypereosinophilia and loss of striations indicates myofiber degeneration and necrosis. Hematoxylin and Eosin stain. 40x magnification.

doi:10.1371/journal.pone.0167163.g001

**Table 2. FMD detection in tissues collected form aborted fetuses and dead calves.**

| Dam ID            | 454 |   |   | 571 |   |   | 483 |   |   | 271 |   |   | 107 |   |   | 450 |   |   | 372 |   |   | 562 |   |   |
|-------------------|-----|---|---|-----|---|---|-----|---|---|-----|---|---|-----|---|---|-----|---|---|-----|---|---|-----|---|---|
|                   | A   | B | C | A   | B | C | A   | B | C | A   | B | C | A   | B | C | A   | B | C | A   | B | C | A   | B | C |
| Heart             | -   | + | - | -   | + | - | -   | - | - | -   | + | - | -   | - | - | -   | - | - | -   | - | - | -   | - | - |
| Liver             | -   | + | + | -   | - | - | -   | - | - | -   | - | - | -   | - | - | -   | - | - | -   | - | - | -   | - | - |
| Kidney            | -   | + | - | -   | - | - | -   | - | - | -   | + | - | -   | - | - | -   | - | - | -   | - | - | -   | - | - |
| Spleen            | -   | + | - | -   | + | - | -   | - | - | -   | + | - | -   | - | - | -   | - | - | -   | - | - | -   | - | - |
| Palatine tonsil   | -   | + | - | -   | + | - | -   | - | - | -   | + | - | -   | + | - | -   | + | - | -   | - | - | -   | - | - |
| Umbilical cord    | -   | + | - | -   | + | - | -   | - | - | -   | - | - | -   | - | - | -   | - | - | -   | - | - | -   | - | - |
| Soft palate       | +   | + | + | +   | + | + | -   | - | - | +   | + | - | -   | + | - | -   | + | - | -   | + | - | -   | + | - |
| Tongue            | -   | - | - | -   | - | - | -   | - | - | -   | - | - | -   | - | - | -   | - | - | -   | - | - | -   | - | - |
| Lungs             | -   | + | + | -   | + | + | -   | - | - | -   | - | - | -   | - | - | -   | - | - | -   | - | - | -   | - | - |
| Sub-mandibular LN | -   | + | - | -   | + | - | -   | - | - | -   | - | - | -   | - | - | -   | - | - | -   | - | - | -   | - | - |

A. FMD virus rescued by transfection, B. Viral Genome detection, C. Immunomicroscopy (immunohistochemistry and immunofluorescence)

doi:10.1371/journal.pone.0167163.t002

in liver, kidney, palatine tonsil, umbilical cord, soft palate, tongue, brain, or sub-mandibular lymph node in any of the examined cases.

Microscopic analysis of grossly affected hearts confirmed the diagnosis of myocarditis with detection of moderate infiltration of inflammatory cells, consisting mainly of lymphocytes dissecting cardiac muscle bundles in affected myocardium (Fig 1C). Additionally, the lungs of two infected calves (Dam ID#s 454 and 571) had mild acute inflammation including interstitial and alveolar infiltrates of few neutrophils and modestly increased alveolar macrophages. Two fetuses had renal changes including mild infiltration of neutrophils within glomeruli and tubular vacuolation (not shown).

### Virus genome detection and chemical transfection from tissues

All 10 tissues collected at necropsy from each abortion case were subjected to chemical transfection and FMDV genome detection by RT-LAMP and m-PCR (Table 2). FMDV serotype O specific viral genome was detected by m-PCR from 7/8 cases (Fig 1) in a total of 27/80 tissues (Table 2). The highest prevalence of detection occurred in soft palate (7/8) and palatine tonsil (4/8). Additionally, viral RNA was detected in the submandibular lymph node (2/8), liver (1/8), kidney (2/8), and lungs (2/8). Infectious FMDV was rescued by transfection of BHK21 from only three out of eight cases and exclusively from the soft palate (two fetuses aborted from clinically affected and one fetus aborted from asymptomatic cow).

Overall, there was a trend of decreasing tissue-level prevalence of FMDV RNA with progressive elapsed time from the period of clinical FMD of the dam. In the single case in which abortion occurred after 4 day post clinical manifestation (dpm) (dam ID#454), 9 out of 10 different types of tissues were found to contain viral genome (Table 2). In the case of the abortion of dam ID 571 at 10dpm, 7 tissues contained FMDV RNA. Interestingly, 5 tissues were RNA-positive in the abortus of a dam (ID# 271) who never had any clinical signs of FMD but was seropositive for FMDV non-structural protein 3AB3.

### Viral sequence analysis

FMDV genomic sequences of the VP1 coding region were obtained from three of the aborted fetuses (Dam ID 454, 571, 271) from the dairy farm in Uttarakhand (Genbank accession numbers KX228159, KX228160 and KX228161). Analysis of a maximum-likelihood phylogenetic tree including these and other recent FMDV isolates from south Asia and north Africa

indicated that the three serotype O isolates clustered within the Ind2001d sub-lineage of ME-SA topotype (Fig 2). Furthermore, all three abortion isolates had 100% nucleotide sequence homology to one another and there was 99.7–100% homology with the serotype O isolates collected from tongue vesicle epithelium from adult animals maintained in the same farm during the active phase of the outbreak in October 2013.

### Immunomicroscopy of tissues from aborted calves

By use of immunomicroscopy (IHC and IFA), FMDV antigen was detected in a total of 5 tissues from two different animals (Table 2). The abortus of cows ID-454 and ID-571 had FMDV antigen in soft palate and lung (Fig 3) whereas antigen was also present in the liver of 571 (not shown). In lungs, FMDV antigen was localized to few large polygonal cells within alveolar spaces. These cells had morphology consistent with alveolar macrophages or degenerate epithelial cells (Fig 3A and 3B). In the soft palate, viral antigen was detected within the superficial subepithelium in rare individual cells or small clusters that had a perivascular distribution around small venules or capillaries (Fig 3C and 3D).

### Discussion

The work described herein represents an opportunistic field investigation of abortions amongst dairy cattle in India subsequent to an outbreak of FMD. In order to assess the causality of abortion and potential of vertical/transplacental transmission of FMDV from infected cows to fetuses, eight aborted calves from affected farms were selected and each was screened by post mortem examination. Although recent works have elucidated several aspects of FMDV pathogenesis in adult cattle [14, 15, 45–47], there are no reports regarding the pathological lesions or presence of viral genome in fetal tissues aborted from FMDV-infected cows. Additionally, there is no previous documentation of FMDV inducing abortion in cattle under experimental or field conditions.

The data herein provide strong evidence for transplacental transmission of FMDV to fetal calves and subsequent FMDV-induced abortion. Due to the unavoidable confounding factors within this field-based study, causality of the abortions was not definitely determined. Other potential causes of abortion were not ruled out as primary or contributory factors. However, recovery of FMDV RNA from fetal tissues of 7 of the 8 abortuses examined supports the premise that the calves were infected transplacentally in utero and that FMDV was the cause of abortion. The finding that 9 out of 10 tissues contained viral RNA at the earliest time point after clinical disease, but subsequent time points had lower prevalence of detection suggests a hematogenous process with subsequent decay of virus loads. These findings are consistent with previous work that demonstrated that transplacental FMDV infection in sheep occurred at 2–4 dpi (days post infection) with viral RNA detected at high levels in several tissues throughout the fetus after 7 dpi [34].

Phylogenetic analysis of FMDV strains recovered from three aborted fetuses from the Uttarakhand herd provided further support for vertical transmission from cows within the same herd. The high sequence homology (>99.7%) of the VP1 protein across outbreak and abortus-derived viruses from the same site confirmed that the strains associated with the abortions were the same strains that had recently caused clinical FMD in that location [17]. However, this finding does not definitively prove vertical transmission since outbreak viruses were not sequenced from the same cows from which abortuses were collected.

In the current study, the soft palate (7/8 cases) and palatine tonsil (5/8 cases) were the most consistent sites of detection of viral RNA suggesting that virus-host interaction in these calves favored replication at these sites. Previous studies have demonstrated that the dorsal soft palate



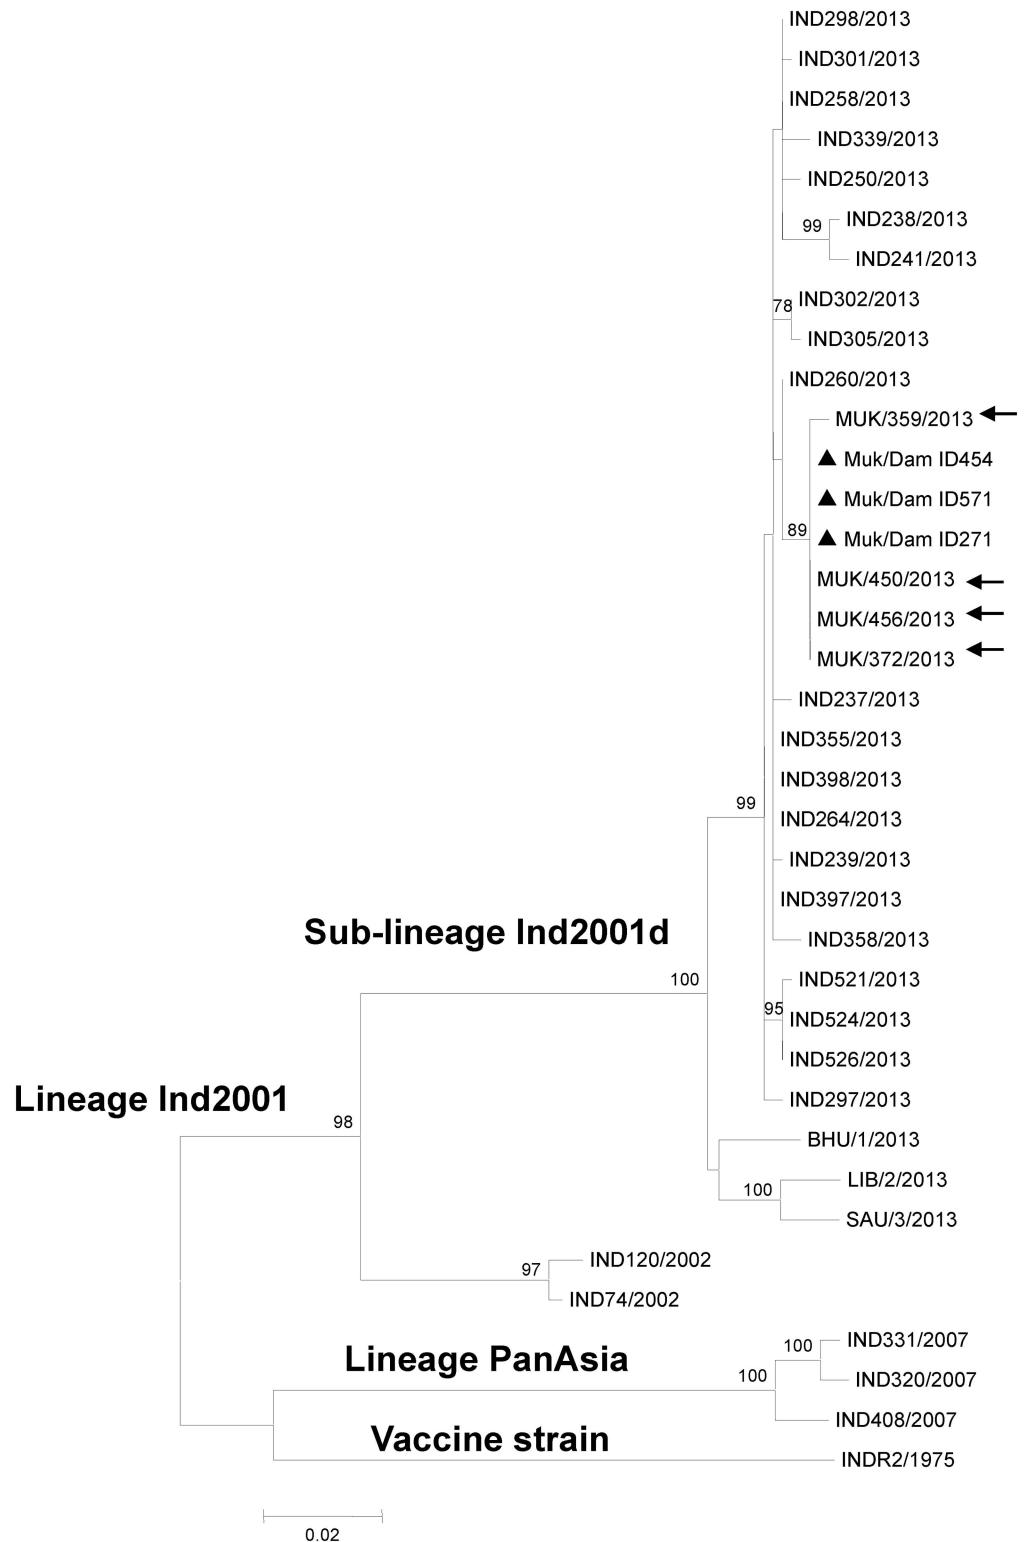

**Fig 2. Maximum Likelihood tree depicting phylogenetic relationship of FMDV serotype O isolates.** Isolates recovered from the aborted fetuses from Mukteswar farm are marked with filled triangle. Isolates recovered from adult cattle from Mukteswar farm are marked with filled circle. Bootstrap values above 70% are shown.

doi:10.1371/journal.pone.0167163.g002

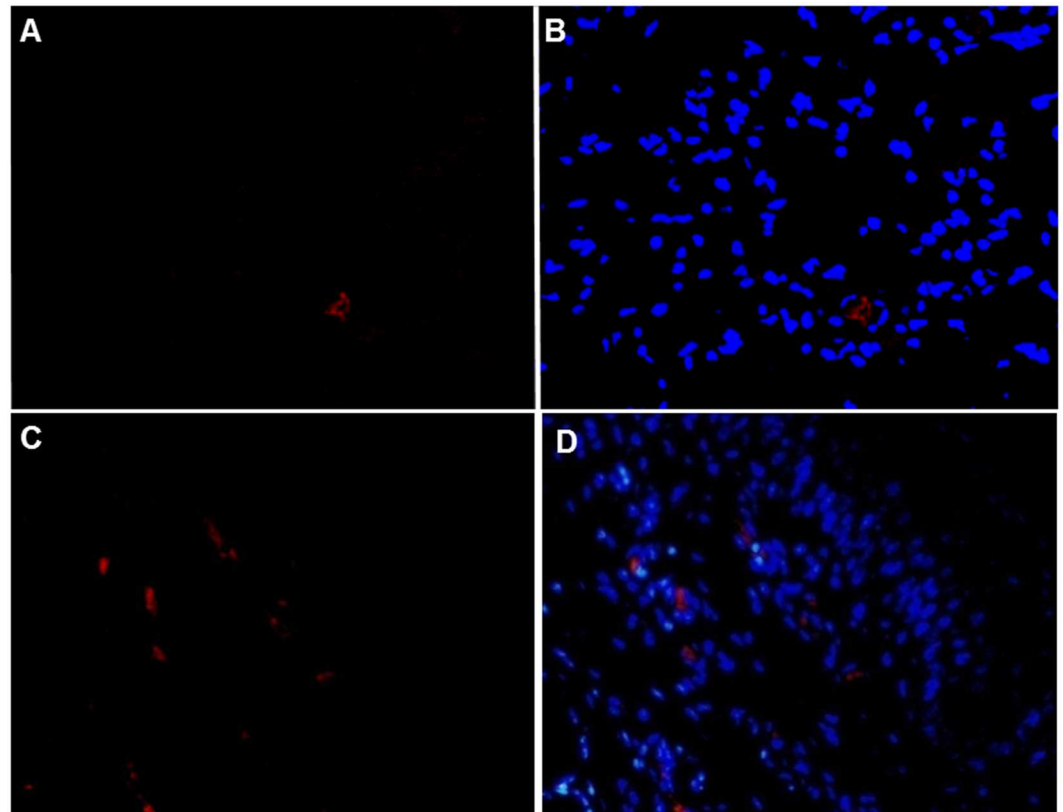

**Fig 3. FMDV antigen detection by multi-channel immunofluorescence technique.** (A) FMDV antigen (red) in few cells in lungs of aborted fetus from Dam ID#454 by indirect fluorescence assay (IFA). (B) Same image as shown in panel (A) merged with nuclear staining by DAPI (blue). (C) FMDV antigen (red) subjacent to basal epithelial cells in dorsal soft palate of aborted fetus. (D) Same image shown in panel (C) merged with nuclear staining by DAPI (blue). Rabbit anti-FMDV serotype O and rodamine-conjugated goat anti-rabbit. 40x magnification.

doi:10.1371/journal.pone.0167163.g003

and the dorsal nasopharynx (the floor and ceiling of the nasopharynx, respectively) is a site of unique FMDV-host tropism in adult cattle during the early [14, 15, 48] and persistent [46, 47, 49, 50] stages of FMD pathogenesis. Earlier works have demonstrated detection of viral RNA for up to two days after cessation of viremia in numerous tissues, but substantially longer duration of detection (up to 72 dpi) in pharyngeal tissues and lymph nodes [47, 51]. In the calves described herein, viral RNA was also detected in the submandibular lymph node (2/8 cases) which is consistent with previous work demonstrating FMDV antigens in lymph nodes of cattle during persistent infection [52].

Our tissue-specific data demonstrated correlation between the detection of rescued FMDV by chemical transfection and of viral RNA by GD methods. This finding suggests that the tissues from which FMDV could be rescued were the sites of the greatest quantity of viral RNA. The finding that FMDV could only be rescued from samples of soft palate further supports the role of this tissue in FMD in these calves.

We have reported herein that under the current naturally occurring conditions of infection with FMDV serotype O, gross lesions in aborted calf fetuses were limited to myocarditis and biventricular effusions suggestive of congestive heart failure. Examination of FMDV-RNA-positive hearts from infected fetuses indicated that infection was associated with mild to moderate degeneration and necrosis of the cardiomyocytes consistent with earlier findings in

sheep, goats, pigs, and adult cattle infected with FMDV [4, 34, 53, 54]. Additionally, affected hearts had variable, moderate infiltration of inflammatory cells, predominantly lymphocytes dissecting myofibers consistent with findings previously described in sheep [10], pigs [53] and cattle [55]. In previous works, FMDV-infected lambs had lymphocytic myocarditis which was considered as a significant stimulus of the cardiac myocytes to release inducible nitric oxide synthase enzyme (iNOS) and thereby increase production of nitric oxide (NO) [56, 57]. Death of aborted fetuses, stillbirth and deaths of calves has been attributed to myocardial degeneration and disruption of the cardiac conduction system [58] as has been observed during post-mortem examination of affected cases. However the current report is the first instance in which FMDV-associated abortion in cattle has been associated with detection of FMDV RNA in grossly identifiable myocarditic foci.

FMDV antigens were localized by indirect immunofluorescent microscopy to only two tissue types, lungs and soft palate. This is consistent with previous works which have localized FMDV to these tissues in adult cows using immunomicroscopy [14, 15, 47] or in situ hybridization [50, 59–61]. The current localization of FMDV to subepithelial regions of the soft palate differs from previous descriptions in adult cattle. Several works have contributed to the growing understanding of the unique tropism of FMDV for the bovine nasopharynx during the acute [14, 15, 48] and persistent phase [46, 47, 49, 50] of infection. Microscopic localization of FMDV antigen has been demonstrated within the superficial epithelium of the nasopharynx of cattle [14, 15, 46, 47]. Similarly, FMDV RNA has been localized in the basal layers of the epithelium of the dorsal soft palate and pharynx [50, 61]. However, the subepithelial, perivascular localization of FMDV in the calves described herein has not been described previously. Further studies are required to describe this microanatomic localization more thoroughly. Neither histogenesis nor pathogenesis of these FMDV-containing cells was definitively determined in the work herein, but it is possible that these cells are antigen-presenting cells that are in transit between the palatal epithelium and microvasculature. Additionally, the localization of FMDV antigens to unattached cells in pulmonary alveoli is consistent with previous conclusions that such cells were either alveolar macrophages [59] or degenerate pneumocytes [14].

## Conclusions

Detection of FMDV RNA and antigens has been demonstrated for the first time from tissues collected from aborted bovine fetuses in association with a naturally occurring outbreak of FMD. This was accomplished with viral genome detection, immunohistochemistry, and recovery of infectious FMDV through transfection. Affected tissues included three anatomic sites (hearts, lungs, and soft palate) for which FMDV is known to have selective tropism in adult cattle. These data suggest vertical transmission of FMDV from dams to fetuses during the acute phase of infection at different stages of pregnancy in cattle. The findings of this preliminary study suggest that further detailed experimental and field investigations may further elucidate the pathogenesis of *in utero* transplacental FMDV infection. It remains unresolved whether the findings described herein are specific to the FMDV-Ind2001d lineage. Additionally, further work is required to investigate whether live-born calves may become asymptotically infected subsequent to infection *in utero* which would have substantial implications for FMDV epidemiology and control in endemic regions.

## Acknowledgments

We are thankful to staff of experimental dairy farm for their invaluable cooperation during this study. Technical assistance of Mr. Basant, Uttam Nath Goswami, Shyam Lal Tamta, and Mr. B. Das are highly acknowledged. Steven Pauszek and Michael Eschbaumer are

acknowledged for review of the manuscript. CS was a recipient of PIADC Research Participation Program fellowships, administered by the Oak Ridge Institute for Science and Education (ORISE) through an interagency agreement with the U.S. Department of Energy. The Office of International Research Programs, Agricultural Research Service USDA facilitated funding from the Biological Engagement Program, Department of State.

## Author Contributions

**Conceptualization:** RR LLR BP JA.

**Data curation:** RR JKB SS.

**Formal analysis:** RR CS JA.

**Funding acquisition:** BP LLR JA.

**Investigation:** RR JKB SS.

**Methodology:** RR KPS JKB SS CS JA.

**Project administration:** RR BP LLR JA.

**Resources:** RR KPS BP LLR JA.

**Software:** SS CS.

**Supervision:** BP LLR JA.

**Validation:** RR JA.

**Visualization:** RR CS JA.

**Writing – original draft:** RR JA.

**Writing – review & editing:** RR JKB CS BP JA.

## References

1. Alexandersen S, Zhang Z, Donaldson AI, Garland AJM. The pathogenesis and diagnosis of foot-and-mouth disease. *J Comp Pathol*. 2003; 129(1):1–36. PMID: [12859905](#)
2. Grubman MJ, Baxt B. Foot-and-mouth disease. *Clin Microbiol Rev*. 2004; 17(2):465–93. doi: [10.1128/CMR.17.2.465-493.2004](#) PMID: [15084510](#)
3. Biswal JK, Sanyal A, Rodriguez LL, Subramaniam S, Arzt J, Sharma GK, et al. Foot-and-mouth disease: Global status and Indian perspective. *Indian Journal of Animal Sciences*. 2012; 82(2):109–31.
4. Arzt J, Baxt B, Grubman MJ, Jackson T, Juleff N, Rhyan J, et al. The pathogenesis of foot-and-mouth disease II: viral pathways in swine, small ruminants, and wildlife; myotropism, chronic syndromes, and molecular virus-host interactions. *Transbound Emerg Dis*. 2011; 58(4):305–26. doi: [10.1111/j.1865-1682.2011.01236.x](#) PMID: [21672184](#)
5. Arzt J, Juleff N, Zhang Z, Rodriguez LL. The pathogenesis of foot-and-mouth disease I: viral pathways in cattle. *Transbound Emerg Dis*. 2011; 58(4):291–304. doi: [10.1111/j.1865-1682.2011.01204.x](#) PMID: [21366894](#)
6. Robson KJ, Harris TJ, Brown F. An assessment by competition hybridization of the sequence homology between the RNAs of the seven serotypes of FMDV. *J Gen Virol*. 1977; 37(2):271–6. doi: [10.1099/0022-1317-37-2-271](#) PMID: [200707](#)
7. Knowles NJ, Samuel AR. Molecular epidemiology of foot-and-mouth disease virus. *Virus Res*. 2003; 91(1):65–80. PMID: [12527438](#)
8. Mohapatra JK, Subramaniam S, Pandey LK, Pawar SS, De A, Das B, et al. Phylogenetic structure of serotype A foot-and-mouth disease virus: global diversity and the Indian perspective. *J Gen Virol*. 2011; 92(Pt 4):873–9. doi: [10.1099/vir.0.028555-0](#) PMID: [21228130](#)

9. Kandeil A, El-Shesheny R, Kayali G, Moatasim Y, Bagato O, Darwish M, et al. Characterization of the recent outbreak of foot-and-mouth disease virus serotype SAT2 in Egypt. *Arch Virol.* 2013; 158(3): 619–27. Epub 2012/11/08. doi: [10.1007/s00705-012-1529-y](https://doi.org/10.1007/s00705-012-1529-y) PMID: [23132412](https://pubmed.ncbi.nlm.nih.gov/23132412/)
10. Gulbahar MY, Davis WC, Guvenc T, Yarim M, Parlak U, Kabak YB. Myocarditis associated with foot-and-mouth disease virus type O in lambs. *Vet Pathol.* 2007; 44(5):589–99. doi: [10.1354/vp.44-5-589](https://doi.org/10.1354/vp.44-5-589) PMID: [17846231](https://pubmed.ncbi.nlm.nih.gov/17846231/)
11. Charleston B, Bankowski BM, Gubbins S, Chase-Topping ME, Schley D, Howey R, et al. Relationship between clinical signs and transmission of an infectious disease and the implications for control. *Science.* 2011; 332(6030):726–9. doi: [10.1126/science.1199884](https://doi.org/10.1126/science.1199884) PMID: [21551063](https://pubmed.ncbi.nlm.nih.gov/21551063/)
12. Orsel K, Bouma A, Dekker A, Stegeman JA, de Jong MC. Foot and mouth disease virus transmission during the incubation period of the disease in piglets, lambs, calves, and dairy cows. *Prev Vet Med.* 2009; 88(2):158–63. doi: [10.1016/j.prevetmed.2008.09.001](https://doi.org/10.1016/j.prevetmed.2008.09.001) PMID: [18929417](https://pubmed.ncbi.nlm.nih.gov/18929417/)
13. Alexandersen S, Quan M, Murphy C, Knight J, Zhang Z. Studies of quantitative parameters of virus excretion and transmission in pigs and cattle experimentally infected with foot-and-mouth disease virus. *J Comp Pathol.* 2003; 129(4):268–82. PMID: [14554125](https://pubmed.ncbi.nlm.nih.gov/14554125/)
14. Arzt J, Pacheco JM, Rodriguez LL. The early pathogenesis of foot-and-mouth disease in cattle after aerosol inoculation: identification of the nasopharynx as the primary site of infection. *Vet Pathol.* 2010; 47(6):1048–63. Epub 2010/07/01. doi: [10.1177/0300985810372509](https://doi.org/10.1177/0300985810372509) PMID: [20587691](https://pubmed.ncbi.nlm.nih.gov/20587691/)
15. Stenfeldt C, Eschbaumer M, Pacheco JM, Rekant SI, Rodriguez LL, Arzt J. Pathogenesis of Primary Foot-and-Mouth Disease Virus Infection in the Nasopharynx of Vaccinated and Non-Vaccinated Cattle. *PLoS One.* 2015; 10(11):e0143666. doi: [10.1371/journal.pone.0143666](https://doi.org/10.1371/journal.pone.0143666) PMID: [26599543](https://pubmed.ncbi.nlm.nih.gov/26599543/)
16. Hemadri D, Tosh C, Sanyal A, Venkataramanan R. Emergence of a new strain of type O foot-and-mouth disease virus: its phylogenetic and evolutionary relationship with the PanAsia pandemic strain. *Virus Genes.* 2002; 25(1):23–34. PMID: [12206305](https://pubmed.ncbi.nlm.nih.gov/12206305/)
17. Subramaniam S, Mohapatra JK, Das B, Sanyal A, Pattnaik B. Genetic and antigenic analysis of foot-and-mouth disease virus serotype O responsible for outbreaks in India during 2013. *Infect Genet Evol.* 2015; 30:59–64. doi: [10.1016/j.meegid.2014.12.009](https://doi.org/10.1016/j.meegid.2014.12.009) PMID: [25511252](https://pubmed.ncbi.nlm.nih.gov/25511252/)
18. Valdazo-Gonzalez B, Knowles NJ, King DP. Genome Sequences of Foot-and-Mouth Disease Virus O/ME-SA/Ind-2001 Lineage from Outbreaks in Libya, Saudi Arabia, and Bhutan during 2013. *Genome Announc.* 2014; 2(2).
19. WRL-FMD. World Reference Laboratory for Foot and Mouth, OIE/FAO Reference Laboratory Network Annual Report 2014. [http://www.wrlfmd.org/ref\\_labs/fmd\\_ref\\_lab\\_reports.htm](http://www.wrlfmd.org/ref_labs/fmd_ref_lab_reports.htm): 2015.
20. WRL-FMD. WRLFMD Quarterly Report April to June 2015. [http://www.wrlfmd.org/ref\\_labs/fmd\\_ref\\_lab\\_reports.htm](http://www.wrlfmd.org/ref_labs/fmd_ref_lab_reports.htm): 2015.
21. Knowles NJ, Bachanek-Bankowska K, Wadsworth J, Mioulet V, Valdazo-Gonzalez B, Eldaghayes IM, et al. Outbreaks of Foot-and-Mouth Disease in Libya and Saudi Arabia During 2013 Due to an Exotic O/ME-SA/Ind-2001 Lineage Virus. *Transbound Emerg Dis.* 2014.
22. MacLachlan J, Dubovi E.J. Epidemiology and control of viral diseases. In: MacLachlan J, Dubovi E.J, editor. *Fenner's Veterinary Virology.* 4 ed. London, UK: Elsevier Inc; 2011.
23. Amedee AM, Lacour N, Gierman JL, Martin LN, Clements JE, Bohm R Jr., et al. Genotypic selection of simian immunodeficiency virus in macaque infants infected transplacentally. *J Virol.* 1995; 69(12): 7982–90. PMID: [7494311](https://pubmed.ncbi.nlm.nih.gov/7494311/)
24. Zhang S, McNeess AL, Butel JS. Quantification of vertical transmission of Murine polyoma virus by real-time quantitative PCR. *J Gen Virol.* 2005; 86(Pt 10):2721–9. doi: [10.1099/vir.0.81168-0](https://doi.org/10.1099/vir.0.81168-0) PMID: [16186225](https://pubmed.ncbi.nlm.nih.gov/16186225/)
25. van der Sluijs MT, Schroer-Joosten DP, Fid-Fourkour A, Vrijenhoek MP, Debyser I, Moulin V, et al. Transplacental transmission of Bluetongue virus serotype 1 and serotype 8 in sheep: virological and pathological findings. *PLoS One.* 2013; 8(12):e81429. doi: [10.1371/journal.pone.0081429](https://doi.org/10.1371/journal.pone.0081429) PMID: [24358112](https://pubmed.ncbi.nlm.nih.gov/24358112/)
26. Khuroo MS, Kamili S, Jameel S. Vertical transmission of hepatitis E virus. *Lancet.* 1995; 345(8956): 1025–6. PMID: [7723501](https://pubmed.ncbi.nlm.nih.gov/7723501/)
27. Belbis G, Breard E, Cordonnier N, Moulin V, Desprat A, Sailleau C, et al. Evidence of transplacental transmission of bluetongue virus serotype 8 in goats. *Vet Microbiol.* 2013; 166(3–4):394–404. doi: [10.1016/j.vetmic.2013.06.020](https://doi.org/10.1016/j.vetmic.2013.06.020) PMID: [23890676](https://pubmed.ncbi.nlm.nih.gov/23890676/)
28. Meas S, Usui T, Ohashi K, Sugimoto C, Onuma M. Vertical transmission of bovine leukemia virus and bovine immunodeficiency virus in dairy cattle herds. *Vet Microbiol.* 2002; 84(3):275–82. PMID: [11731179](https://pubmed.ncbi.nlm.nih.gov/11731179/)
29. Trautwein G, Hewicker M, Liess B, Orban S, Grunert E. Studies on transplacental transmissibility of a bovine virus diarrhoea (BVD) vaccine virus in cattle. III. Occurrence of central nervous system

- malformations in calves born from vaccinated cows. *Zentralbl Veterinarmed B*. 1986; 33(4):260–8. PMID: [3751389](#)
30. Geering WA. Foot-and-mouth disease in sheep. *Australian Veterinary Journal*. 1967; 43:485–9.
  31. Nazliglu M. Foot and mouth disease in sheep and goats *Bull Off int Epiz* 1972; 77:1281–4.
  32. Reid HW. FMD in a parturient sheep flock. *Vet Rec*. 2002; 150(25):791.
  33. Ryan E, Horsington J, Durand S, Brooks H, Alexandersen S, Brownlie J, et al. Foot-and-mouth disease virus infection in young lambs: pathogenesis and tissue tropism. *Vet Microbiol*. 2008; 127(3–4):258–74. doi: [10.1016/j.vetmic.2007.08.029](#) PMID: [17942248](#)
  34. Ryan E, Horsington J, Brownlie J, Zhang Z. Foot-and-mouth disease virus infection in fetal lambs: tissue tropism and cytokine response. *J Comp Pathol*. 2008; 138(2–3):108–20. Epub 2008/02/26. doi: [10.1016/j.jcpa.2007.12.001](#) PMID: [18295784](#)
  35. Senturk B, Yalcin C. Financial impact of foot-and-mouth disease in Turkey: acquisition of required data via Delphi expert opinion survey. *Veterinari Medicina*. 2005; 50(10):451–60.
  36. Bhattacharya S, Pattnaik B, Venkataramanan R. Development and application of sandwich enzyme-linked immunosorbent assay (ELISA) for type identification of foot-and-mouth disease (FMD) virus in direct field materials. *Indian Journal of Animal Sciences*. 1996; 66:1–9.
  37. Samuel AR, Knowles NJ. Foot-and-mouth disease type O viruses exhibit genetically and geographically distinct evolutionary lineages (topotypes). *J Gen Virol*. 2001; 82(Pt 3):609–21. doi: [10.1099/0022-1317-82-3-609](#) PMID: [11172103](#)
  38. Ranjan R, Kangayan M, Subramaniam S, Mohapatra JK, Biswal JK, Sharma GK, et al. Development and evaluation of a one step reverse transcription-loop mediated isothermal amplification assay (RT-LAMP) for rapid detection of foot and mouth disease virus in India. *Virusdisease*. 2014; 25(3):358–64. doi: [10.1007/s13337-014-0211-2](#) PMID: [25674604](#)
  39. Giridharan P, Hemadri D, Tosh C, Sanyal A, Bandyopadhyay SK. Development and evaluation of a multiplex PCR for differentiation of foot-and-mouth disease virus strains native to India. *J Virol Methods*. 2005; 126(1–2):1–11. doi: [10.1016/j.jviromet.2005.01.015](#) PMID: [15847913](#)
  40. Bisht P, Mohapatra JK, Subramaniam S, Das B, Pande V, Biswal JK, et al. Efficient rescue of foot-and-mouth disease virus in cultured cells transfected with RNA extracted from clinical samples. *J Virol Methods*. 2014; 196:65–70. doi: [10.1016/j.jviromet.2013.10.041](#) PMID: [24239633](#)
  41. Knowles NJ, Samuel AR. Polymerase chain reaction amplification and cycle sequencing of the 1D (VP1) gene of foot-and-mouth disease virus. Repeat session of the standing technical committee of the European Commission for control of FMD (FAO); Austria1994. p. 45–53.
  42. Tamura K, Stecher G, Peterson D, Filipinski A, Kumar S. MEGA6: Molecular Evolutionary Genetics Analysis version 6.0. *Mol Biol Evol*. 2013; 30(12):2725–9. doi: [10.1093/molbev/mst197](#) PMID: [24132122](#)
  43. Arzt J, Gregg DA, Clavijo A, Rodriguez LL. Optimization of immunohistochemical and fluorescent antibody techniques for localization of Foot-and-mouth disease virus in animal tissues. *J Vet Diagn Invest*. 2009; 21(6):779–92. Epub 2009/11/11. PMID: [19901278](#)
  44. Biswal J, Subramaniam S, Ranjan R, Sharma GK, Pattnaik B. Isolation and Characterization of foot-and-mouth disease virus from a captive Indian elephant (*Elephas maximus*). *Indian journal of Veterinary Pathology*. 2015; 39:376–9.
  45. Pacheco JM, Arzt J, Rodriguez LL. Early events in the pathogenesis of foot-and-mouth disease in cattle after controlled aerosol exposure. *Vet J*. 2010; 183(1):46–53. doi: [10.1016/j.tvjl.2008.08.023](#) PMID: [18930417](#)
  46. Pacheco JM, Smoliga GR, O'Donnell V, Brito BP, Stenfeldt C, Rodriguez LL, et al. Persistent Foot-and-Mouth Disease Virus Infection in the Nasopharynx of Cattle; Tissue-Specific Distribution and Local Cytokine Expression. *PLoS One*. 2015; 10(5):e0125698. doi: [10.1371/journal.pone.0125698](#) PMID: [25996935](#)
  47. Stenfeldt C, Eschbaumer M, Rekant SI, Pacheco JM, Smoliga GR, Hartwig EJ, et al. The Foot-and-Mouth Disease Carrier State Divergence in Cattle. *J Virol*. 2016; 90(14):6344–64. doi: [10.1128/JVI.00388-16](#) PMID: [27147736](#)
  48. Burrows R, Mann JA, Garland AJ, Greig A, Goodridge D. The pathogenesis of natural and simulated natural foot-and-mouth disease infection in cattle. *J Comp Pathol*. 1981; 91(4):599–609. PMID: [6274930](#)
  49. Burrows R. Studies on the carrier state of cattle exposed to foot-and-mouth disease virus. *Journal of Hygiene*. 1966; 64(1):81–90. Epub 1966/03/01. PMID: [5219023](#)
  50. Zhang ZD, Kitching RP. The localization of persistent foot and mouth disease virus in the epithelial cells of the soft palate and pharynx. *J Comp Pathol*. 2001; 124(2–3):89–94. doi: [10.1053/jcpa.2000.0431](#) PMID: [11222004](#)

51. Zhang Z, Alexandersen S. Quantitative analysis of foot-and-mouth disease virus RNA loads in bovine tissues: implications for the site of viral persistence. *J Gen Virol.* 2004; 85(Pt 9):2567–75. doi: [10.1099/vir.0.80011-0](https://doi.org/10.1099/vir.0.80011-0) PMID: [15302950](https://pubmed.ncbi.nlm.nih.gov/15302950/)
52. Juleff N, Windsor M, Reid E, Seago J, Zhang Z, Monaghan P, et al. Foot-and-mouth disease virus persists in the light zone of germinal centres. *PLoS One.* 2008; 3(10):e3434. doi: [10.1371/journal.pone.0003434](https://doi.org/10.1371/journal.pone.0003434) PMID: [18941503](https://pubmed.ncbi.nlm.nih.gov/18941503/)
53. Stenfeldt C, Pacheco JM, Borca MV, Rodriguez LL, Arzt J. Morphologic and phenotypic characteristics of myocarditis in two pigs infected by foot-and mouth disease virus strains of serotypes O or A. *Acta Vet Scand.* 2014; 56:42. doi: [10.1186/s13028-014-0042-6](https://doi.org/10.1186/s13028-014-0042-6) PMID: [25015718](https://pubmed.ncbi.nlm.nih.gov/25015718/)
54. Ali S, Madboli A. Further immunological studies on the female genital system and some visceral organs of sheep and goats naturally infected with foot-and-mouth disease. *Global Veterinaria.* 2013; 11(4): 472–80.
55. Karapinar T, Dabak DO, Kuloglu T, Bulut H. High cardiac troponin I plasma concentration in a calf with myocarditis. *Can Vet J.* 2010; 51(4):397–9. Epub 2010/07/02. PMID: [20592829](https://pubmed.ncbi.nlm.nih.gov/20592829/)
56. de Belder AJ, Radomski MW, Why HJ, Richardson PJ, Bucknall CA, Salas E, et al. Nitric oxide synthase activities in human myocardium. *Lancet.* 1993; 341(8837):84–5. PMID: [7678120](https://pubmed.ncbi.nlm.nih.gov/7678120/)
57. Kelly RA, Balligand JL, Smith TW. Nitric oxide and cardiac function. *Circ Res.* 1996; 79(3):363–80. PMID: [8781470](https://pubmed.ncbi.nlm.nih.gov/8781470/)
58. Singh R, Pandey AB, Chandra D, Singh KP, Mehrotra ML. Epidemiology of malignant form of foot-and-mouth disease in susceptible cattle and buffalo population of Punjab and Uttar Pradesh. *Indian Journal of Animal Sciences.* 2008; 78(1):3–7.
59. Brown CC, Meyer RF, Olander HJ, House C, Mebus CA. A pathogenesis study of foot-and-mouth disease in cattle, using in situ hybridization. *Can J Vet Res.* 1992; 56(3):189–93. PMID: [1330277](https://pubmed.ncbi.nlm.nih.gov/1330277/)
60. Brown CC, Piccone ME, Mason PW, McKenna TS, Grubman MJ. Pathogenesis of wild-type and leaderless foot-and-mouth disease virus in cattle. *J Virol.* 1996; 70(8):5638–41. PMID: [8764079](https://pubmed.ncbi.nlm.nih.gov/8764079/)
61. Prato Murphy ML, Forsyth MA, Belsham GJ, Salt JS. Localization of foot-and-mouth disease virus RNA by in situ hybridization within bovine tissues. *Virus Res.* 1999; 62(1):67–76. PMID: [10513288](https://pubmed.ncbi.nlm.nih.gov/10513288/)
